# Supplementary material for: A-site cation with high vibrational motion in ABX3 perovskite effectively induces dielectric phase transition
Source: Royal Society of Chemistry journal article supplement (doi:10.1039/d0dt04415f), 2021-01-01
Supplement: d0dt04415f1.pdf [file d0dt04415f1.pdf]

## Supporting information

### **A-site cation with high vibrational motion in ABX<sub>3</sub> perovskite effectively induce dielectric phase transition**

Yu-zhen Wang,<sup>ab</sup> Zhi-Xu Zhang,<sup>a</sup> Chang-Yuan Su,<sup>a</sup> Tie Zhang,<sup>a</sup> Da-Wei Fu<sup>\*ab</sup> and Yi Zhang<sup>\*a</sup>

(a Ordered Matter Science Research Center, Jiangsu Key Laboratory for Science and Applications of Molecular Ferroelectrics, Southeast University, Nanjing, 211189, People's Republic of China.

b Institute for Science and Applications of Molecular Ferroelectrics, Key Laboratory of the Ministry of Education for Advanced Catalysis Materials, Zhejiang Normal University, Jinhua, 321004, People's Republic of China.)

### **Experimental Measurement Methods**

#### **Variable temperature X-ray crystallography**

The crystal diffraction data of [FMPD][Cd(SCN)<sub>3</sub>] were collected on Rigaku Saturn 724 diffractometer with Mo K $\alpha$  diffraction ( $\lambda = 0.71073 \text{ \AA}$ ) at 273 K and 333 K. And the data processing including empirical absorption correction was carried out with crystal clear software package. The crystal structures of [FMPD][Cd(SCN)<sub>3</sub>] before and after phase transition were solved by direct method and refined by the full matrix least-squares method based on  $F^2$  in the SHELXTL program package. All the H atoms are geometrically generated at the appropriate positions, while the other atoms are refined by all reflections of  $I > 2\sigma(I)$ . The minimum asymmetric unit and packing view of the crystal structure were drawn by DIAMOND software. Other specific crystallographic data and structure refinements details are given in Table S1.

#### **Other measurements**

The heating and cooling cycle measurements of the dielectric constant and the dielectric loss were performed on the Tonghui TH2828A instrument at frequencies of 5 kHz, 10 kHz, 100 kHz, and 1 MHz respectively. The compressed tablet and single crystal samples of [FMPD][Cd(SCN)<sub>3</sub>] deposited with silver conductive glue were used as the electrode in the dielectric measurement. The differential scanning calorimetry (DSC)

measurement was performed on the PerkinElmer diamond DSC instrument under a nitrogen atmosphere. The powder sample of [FMPD][Cd(SCN)<sub>3</sub>] (10.3 mg) experienced heating and cooling cycle measurement in the temperature range of 240 K to 375 K at a scan rate of 20 K min<sup>-1</sup>. IR spectra were conducted on a Shimadzu IR Prestige-21. Variable-temperature powder X-ray diffraction (PXRD) measurements were performed on a Rigaku D/MAX 2000 PC X-ray diffractometer. The PXRD patterns were collected in the 2 $\theta$  range of 5°-50° with a step size of 0.02°. Thermogravimetric analysis (TGA) was performed on a TA Q50 system at a heating rate of 10 K min<sup>-1</sup> in the nitrogen atmosphere.

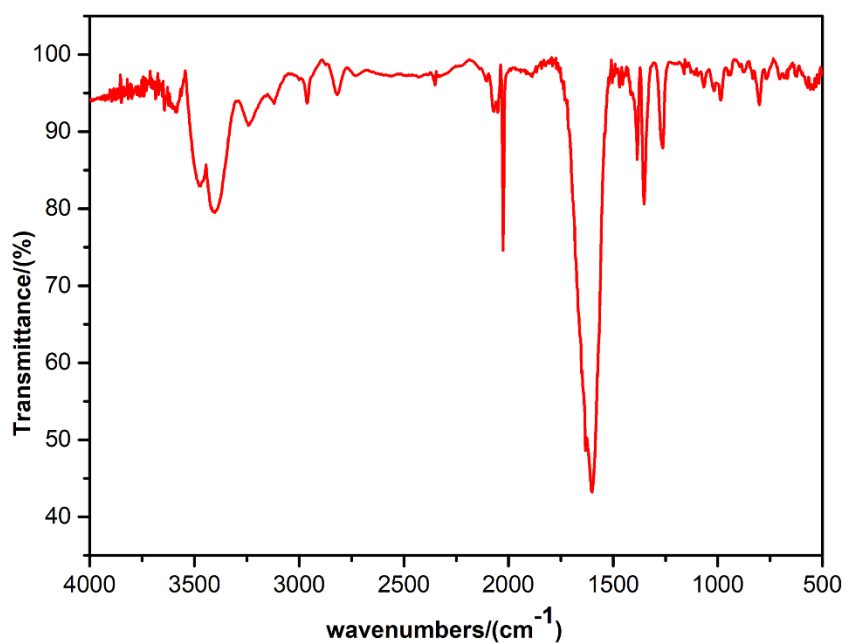

**Fig S1.** Infrared spectrum of [FMPD][Cd(SCN)<sub>3</sub>].

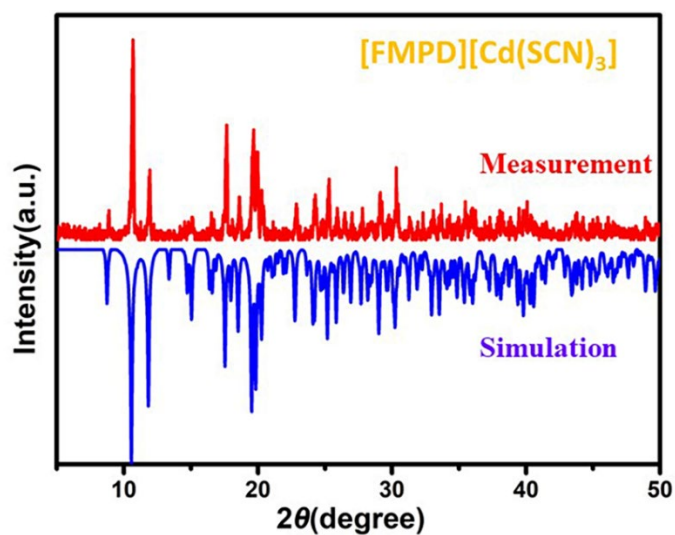

**Fig S2.** Comparison between measurement and simulation PXRD of  $[\text{FMPD}][\text{Cd}(\text{SCN})_3]$ .

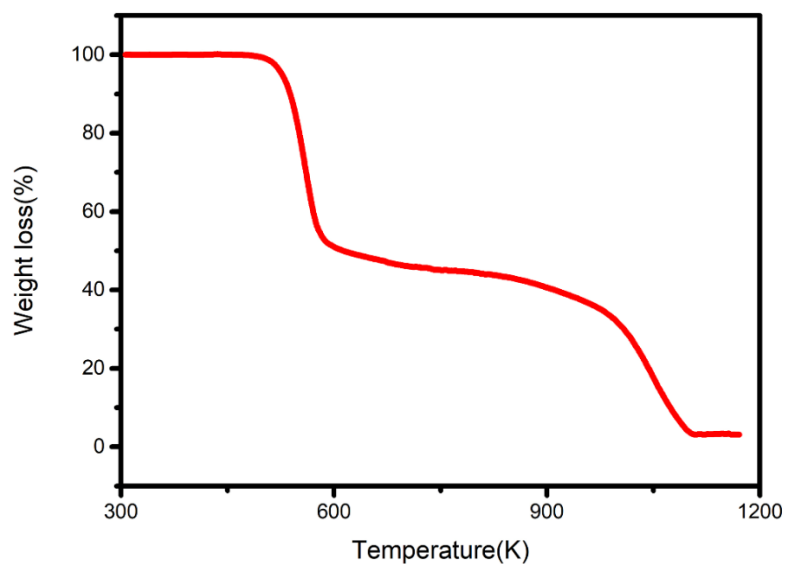

**Fig S3.** TGA curve of  $[\text{FMPD}][\text{Cd}(\text{SCN})_3]$ .

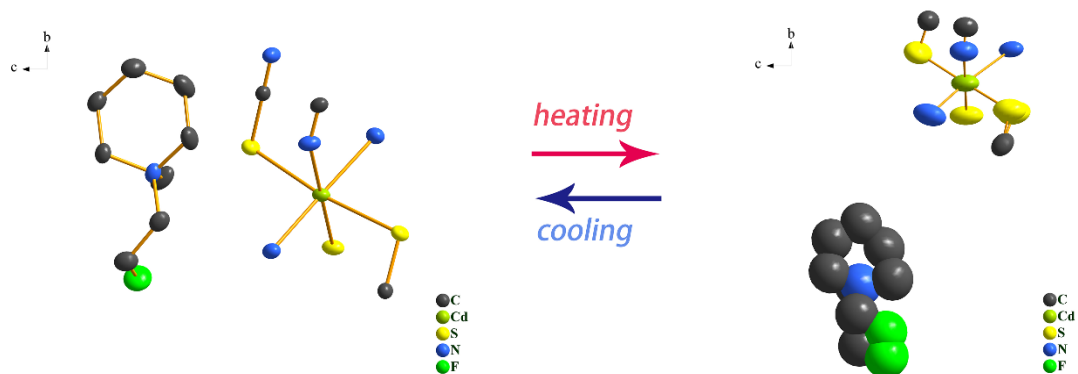

**Fig S4.** LTP and ITP thermal ellipsoid probability diagram of the smallest asymmetric unit.

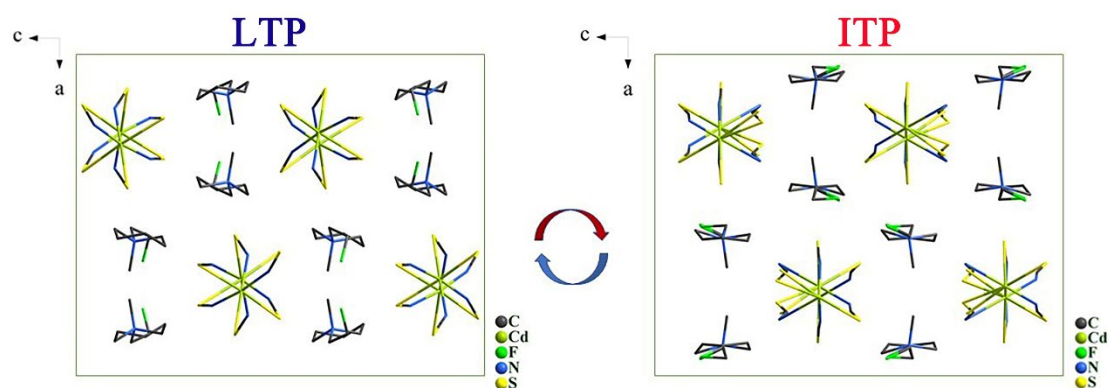

**Fig S5.** Packing of [FMPD][Cd(SCN)<sub>3</sub>] in LTP and ITP from the perspective of b-axis.

**Table S1.** Crystal data and structure refinements for [FMPD][Cd(SCN)<sub>3</sub>] at 273 K and 333 K.

|                                                          | LTP (273K)                                                       | ITP (333K)                                                       |
|----------------------------------------------------------|------------------------------------------------------------------|------------------------------------------------------------------|
| <b>Empirical formula</b>                                 | C <sub>11</sub> H <sub>17</sub> N <sub>4</sub> CdFS <sub>3</sub> | C <sub>11</sub> H <sub>17</sub> N <sub>4</sub> CdFS <sub>3</sub> |
| <b>Formula weight</b>                                    | 432.88                                                           | 432.88                                                           |
| <b>Crystal system</b>                                    | orthorhombic                                                     | orthorhombic                                                     |
| <b>Space group</b>                                       | <i>Pbca</i>                                                      | <i>Pbca</i>                                                      |
| <b><i>a</i>/ Å</b>                                       | 14.9579(13)                                                      | 16.4557(13)                                                      |
| <b><i>b</i>/ Å</b>                                       | 10.8069(7)                                                       | 10.7894(5)                                                       |
| <b><i>c</i>/ Å</b>                                       | 20.2117                                                          | 19.3242(19)                                                      |
| <b><i>α</i>/ °</b>                                       | 90                                                               | 90                                                               |
| <b><i>β</i>/ °</b>                                       | 90                                                               | 90                                                               |
| <b><i>γ</i>/ °</b>                                       | 90                                                               | 90                                                               |
| <b><i>Volume</i>/ Å<sup>3</sup></b>                      | 3267.19(50)                                                      | 3430.96(50)                                                      |
| <b><i>Z</i></b>                                          | 8                                                                | 8                                                                |
| <b><i>F</i> (000)</b>                                    | 1728.0                                                           | 1592.0                                                           |
| <b>GOF</b>                                               | 1.074                                                            | 1.658                                                            |
| <b><i>R</i><sub>1</sub>[<i>I</i> &gt; 2σ(<i>I</i>)]</b>  | 0.0323                                                           | 0.1822                                                           |
| <b><i>wR</i><sub>2</sub>[<i>I</i> &gt; 2σ(<i>I</i>)]</b> | 0.0559                                                           | 0.4447                                                           |

**Table S2.** Selected bond lengths and bond angles for [FMPD][Cd(SCN)<sub>3</sub>] at 273 K and 333 K.

| Temperature  | Bond lengths [Å] |            | Bond angles [°] |            |
|--------------|------------------|------------|-----------------|------------|
| <b>273 K</b> | C1—C2            | 1.514(2)   | C3—C2—C1        | 111.77(16) |
|              | C5—N1            | 1.520(2)   | C2—C3—C4        | 110.56(18) |
|              | C7—N1            | 1.517(2)   | C3—C4—C5        | 110.55(19) |
|              | C8—F1            | 1.382(3)   | C4—C5—N1        | 113.26(16) |
|              | C9—N2            | 1.1480(19) | C8—C7—N1        | 116.96(15) |
|              | C9—S3            | 1.6435(15) | F1—C8—C7        | 111.15(19) |
|              | C10—N4           | 1.156(2)   | N2—C9—S3        | 178.64(15) |
|              | C10—S1           | 1.6413(16) | N2—Cd1—N4       | 89.69(5)   |
|              | C11—N3           | 1.1589(19) | N2—Cd1—S1       | 93.76(4)   |
|              | C11—S2           | 1.6387(15) | N2—Cd1—S3       | 96.70(4)   |
|              | Cd1—N2           | 2.2932(14) | C6—N1—C1        | 110.37(14) |
|              | Cd1—N4           | 2.3353(15) | C6—N1—C7        | 109.62(15) |
|              | Cd1—S1           | 2.6888(5)  | C1—N1—C7        | 110.41(13) |
|              | Cd1—S2           | 2.7671(5)  | C6—N1—C5        | 110.74(17) |
|              | N2—C9            | 1.1479(19) | C1—N1—C5        | 108.73(14) |
|              | N3—Cd1           | 2.3407(14) | C7—N1—C5        | 106.91(13) |
|              | S1—C10           | 1.6412(16) | C9—N2—Cd1       | 152.91(13) |
|              |                  |            | C10—N4—Cd1      | 142.13(14) |
| <b>333 K</b> | C1—C2            | 1.5001(14) | C3—C2—C1        | 120.91(15) |
|              | C5—N1            | 1.5001(12) | C4—C3—C2        | 103.68(11) |
|              | C7—N1            | 1.5002(12) | C3—C4—C5        | 144.7(2)   |
|              | C8A—F1A          | 1.3802(16) | N1—C5—C4        | 80.42(8)   |
|              | C9—N2            | 1.265(5)   | C8B—C7—N1       | 129.08(13) |
|              | C9—S3A           | 1.568(5)   | C8A—C7—N1       | 130.75(14) |
|              | C10—N4           | 1.156(5)   | F1A—C8A—C7      | 105.9(2)   |
|              | C10—S1           | 1.610(4)   | N2—C9—S3A       | 165.5(5)   |
|              | C11—N3           | 1.280(3)   | N2—C9—S3B       | 165.1(5)   |
|              | C11—S2B          | 1.5668(19) | N4—Cd1—N2       | 92.68(15)  |
|              | Cd1—N2           | 2.316(5)   | N2—Cd1—S1       | 91.87(11)  |
|              | Cd1—N4           | 2.289(5)   | N2—Cd1—S3B      | 87.21(15)  |
|              | Cd1—S1           | 2.7289(17) | C6—N1—C1        | 92.4(3)    |

|        |           |            |           |
|--------|-----------|------------|-----------|
| Cd1—S2 | 2.7671(5) | C6—N1—C7   | 111.1(4)  |
| N2—C9  | 1.265(5)  | C1—N1—C7   | 98.20(19) |
| S1—C10 | 1.610(4)  | C5—N1—C7   | 97.25(19) |
|        |           | C9—N2—Cd1  | 136.9(4)  |
|        |           | C10—N4—Cd1 | 149.3(4)  |

---
